# Supplementary material for: Impacts of N-P-K-Mg Fertilizer Combinations on Tree Parameters and Fungal Disease Incidences in Apple Cultivars with Varying Disease Susceptibility
Source: MDPI journal article supplement (doi:10.3390/plants13091217), 2024-04-28
Supplement: s1 [file s1]

# Supplementary material:

**Table S1.** The mean and minimum temperatures and precipitation (Debrecen-Pallag, Hungary, 2016-2022).

| Months    | Mean temperature (°C) |      |      |      |      |      |      | Minimum temperature (°C) |       |       |       |      |       |       | Precipitation (mm) |      |      |      |      |      |      |
|-----------|-----------------------|------|------|------|------|------|------|--------------------------|-------|-------|-------|------|-------|-------|--------------------|------|------|------|------|------|------|
|           | 2016                  | 2017 | 2018 | 2019 | 2020 | 2021 | 2022 | 2016                     | 2017  | 2018  | 2019  | 2020 | 2021  | 2022  | 2016               | 2017 | 2018 | 2019 | 2020 | 2021 | 2022 |
| January   | -1.7                  | -6.0 | 2.6  | -1.3 | -1.3 | 1.4  | -0.2 | -15.7                    | -17.9 | -8.0  | -13.4 | -9.0 | -11.7 | -11.4 | 63                 | 21   | 27   | 24   | 24   | 37   | 8    |
| February  | 6.1                   | 2.1  | 0.4  | 3.4  | 4.6  | 2.3  | 4.1  | -4.1                     | -5.0  | -13.4 | -6.1  | -7.9 | -12.8 | -5.3  | 91                 | 40   | 58   | 7    | 53   | 39   | 13   |
| March     | 7.0                   | 9.2  | 3.6  | 8.7  | 7.0  | 5.3  | 5.2  | -6.2                     | -2.6  | -17.0 | -5.6  | -4.1 | -7.9  | -9.0  | 48                 | 28   | 69   | 8    | 39   | 21   | 10   |
| April     | 13.3                  | 10.7 | 16.5 | 13.3 | 11.5 | 9.0  | 9.7  | -1.0                     | -0.7  | 4.2   | 1.2   | -7.5 | -4.6  | -2.6  | 15                 | 51   | 25   | 47   | 17   | 45   | 49   |
| May       | 16.5                  | 17.2 | 20.2 | 14.7 | 14.8 | 15.1 | 17.9 | 3.0                      | 3.5   | 10.5  | 5.2   | 0.8  | 1.6   | 3.7   | 44                 | 27   | 49   | 69   | 33   | 63   | 39   |
| June      | 21.1                  | 22.2 | 21.3 | 23.7 | 20.5 | 22.8 | 23.1 | 7.1                      | 9.6   | 7.1   | 11.4  | 6.6  | 7.8   | 8.9   | 118                | 64   | 65   | 31   | 147  | 8    | 13   |
| July      | 22.3                  | 22.3 | 22.9 | 21.9 | 21.8 | 25.0 | 23.9 | 9.6                      | 9.1   | 7.9   | 8.3   | 9.7  | 14.1  | 7.5   | 78                 | 69   | 36   | 56   | 101  | 52   | 38   |
| August    | 20.8                  | 23.2 | 24.1 | 23.5 | 23.2 | 21.2 | 23.8 | 7.9                      | 7.7   | 11.0  | 9.2   | 10.2 | 8.3   | 13.7  | 49                 | 61   | 25   | 18   | 29   | 31   | 10   |
| September | 17.6                  | 16.4 | 17.6 | 17.0 | 17.9 | 16.4 | 15.8 | 3.4                      | 2.0   | 2.0   | 1.1   | 6.5  | 3.1   | 3.6   | 62                 | 78   | 17   | 22   | 52   | 18   | 153  |
| October   | 9.7                   | 10.8 | 12.7 | 12.3 | 12.3 | 9.5  | 12.2 | -0.8                     | -3.4  | -1.3  | -2.4  | 2.6  | -3.4  | -1.8  | 89                 | 38   | 13   | 16   | 73   | 13   | 8    |
| November  | 4.6                   | 5.7  | 6.9  | 9.8  | 5.2  | 5.4  | 6.8  | -5.1                     | -5.1  | -10.8 | -3.6  | -5.3 | -6.1  | -1.6  | 56                 | 57   | 39   | 81   | 15   | 30   | 49   |
| December  | -1.8                  | 2.9  | 0.7  | 6.4  | 4.5  | 1.3  | 2.6  | -9.5                     | -2.6  | -12.1 | -3.2  | -6.4 | -8.7  | -7.3  | 6                  | 102  | 44   | 49   | 28   | 39   | 92   |
| Sum       | -                     | -    | -    | -    | -    | -    | -    | -                        | -     | -     | -     | -    | -     | -     | 720                | 636  | 466  | 429  | 611  | 397  | 482  |
